# Supplementary material for: What is the effect of MRI with targeted biopsies on the rate of patients discontinuing active surveillance? A reflection of the use of MRI in the PRIAS study
Source: PubMed Central journal article supplement (PMC8616762; doi:10.1038/s41391-021-00343-2), 2021-04-08
Supplement: 41391_2021_343_MOESM1_ESM.pdf [file 41391_2021_343_MOESM1_ESM.pdf]

| Inclusion criteria     | Group A                    | Group B/C                  |
|------------------------|----------------------------|----------------------------|
| PSA                    | ≤ 10 ng/mL                 | ≤ 10 ng/mL                 |
| PSA density            | <0,2 ng/mL/cm <sup>3</sup> | <0,2 ng/mL/cm <sup>3</sup> |
| cT stage               | <T3                        | <T3                        |
| Grade Group            | 1                          | 1                          |
| Total numbers positive | ≤ 2                        | -                          |
| Follow-up criteria     |                            |                            |
| cT stage               | <T3                        | <T3                        |
| Grade Group            | 1                          | 1                          |
| Total numbers positive | ≤ 2                        | -                          |
| PSA doubling time      | > 3 years                  | -                          |

**Supplementary file Table 1** – The inclusion criteria for patients in group A and group B/C.
