# Supplementary material for: What is the effect of MRI with targeted biopsies on the rate of patients discontinuing active surveillance? A reflection of the use of MRI in the PRIAS study
Source: PubMed Central journal article supplement (PMC8616762; doi:10.1038/s41391-021-00343-2), 2021-04-08
Supplement: 41391_2021_343_MOESM2_ESM.pdf [file 41391_2021_343_MOESM2_ESM.pdf]

| Year                           | 0 |    |   |   |    | 2  |    |    |    | 3  |    | 4  |    | 5  |    | 6  |    | 7  |    |
|--------------------------------|---|----|---|---|----|----|----|----|----|----|----|----|----|----|----|----|----|----|----|
| Month                          | 0 | 3  | 6 | 9 | 12 | 15 | 18 | 21 | 24 | 30 | 36 | 42 | 48 | 54 | 60 | 66 | 72 | 78 | 84 |
| PSA                            | x | x  | x | x | x  | x  | x  | x  | x  | x  | x  | x  | x  | x  | x  | x  | x  | x  | x  |
| DRE                            | x |    | x |   | x  |    | x  |    | x  |    | x  |    | x  |    | x  |    | x  |    | x  |
| Systematic Biopsy              | x |    |   |   | x  |    |    |    |    |    |    |    | x  |    |    |    |    |    | x  |
| Evaluation                     | x |    | x |   | x  |    | x  |    | x  |    | x  |    | x  |    | x  |    | x  |    | x  |
| MRI + possible targeted biopsy |   | x* |   |   | x  |    |    |    |    |    |    |    | x  |    |    |    |    |    | x  |

**Supplementary file Table 2** – The recommended follow up schedule of the PRIAS study.  
 In red the addition for group B and C. MRI with targeted biopsies is only recommended for patients without upfront MRI (group B).
